# Supplementary material
Source: Royal Society of Chemistry journal article supplement (doi:10.1039/d6va00161k)
Supplement: d6va00161k1.pdf [file d6va00161k1.pdf]

**SI Table S1.** Sampling locations

| STT | Location code | Description of location                                                           | Coordinates<br>(VN2000, 107 <sup>o</sup> , projection zone 6 <sup>o</sup> ) |              |
|-----|---------------|-----------------------------------------------------------------------------------|-----------------------------------------------------------------------------|--------------|
|     |               |                                                                                   | Longitude (X)                                                               | Latitude (Y) |
| 1   | STT           | Ta Trach River, 1 km upstream from the Tuan Junction                              | 561910                                                                      | 1811523      |
| 2   | SHT           | Huu Trach River, 1 km upstream from the Tuan Junction                             | 560644                                                                      | 1811592      |
| 3   | SH1           | Huong River, Tuan Junction area                                                   | 561364                                                                      | 1812782      |
| 4   | SH2           | Huong River, near Xuoc Du Bridge                                                  | 556487                                                                      | 1818646      |
| 5   | SH3           | Huong River, Dong Ba Market area                                                  | 562770                                                                      | 1821190      |
| 6   | SH4           | Huong River, near Hue Fisheries Development Joint Stock Company                   | 561931                                                                      | 1823884      |
| 7   | SH5           | Huong River, Sinh Junction area                                                   | 561100                                                                      | 1827453      |
| 8   | SH6           | Huong River, upstream of Thao Long Dam                                            | 565094                                                                      | 1829665      |
| 9   | SH7           | Huong River, downstream of Thao Long Dam (river mouth area)                       | 567062                                                                      | 1830136      |
| 10  | SB1           | Huong Dien Hydropower Reservoir, dam area                                         | 546845                                                                      | 1821297      |
| 11  | SB2           | Bo River, An Lo Bridge area                                                       | 548382                                                                      | 1829302      |
| 12  | SB3           | Bo River, Huong Can Bridge area                                                   | 556908                                                                      | 1826358      |
| 13  | SB4           | Bo River, An Xuan Sluice area, Quang An Commune                                   | 558825                                                                      | 1831723      |
| 14  | SPB1          | Phu Bai River, 500 m upstream from the discharge point of Phu Bai Industrial Zone | 573866                                                                      | 1811232      |
| 15  | SPB2          | Phu Bai River, at Phu Bai Bridge                                                  | 577011                                                                      | 1810355      |
| 16  | SPB3          | Phu Bai River, before flowing into the Dai Giang River                            | 579112                                                                      | 1812381      |
| 17  | ĐP1           | Tam Giang Lagoon (Con Toc Ferry area)                                             | 552899                                                                      | 1835447      |
| 18  | ĐP2           | Sam - Thanh Lam Lagoon (near Mui Han)                                             | 572234                                                                      | 1826885      |

| STT | Location code | Description of location                | Coordinates<br>(VN2000, 107 <sup>o</sup> , projection zone 6 <sup>o</sup> ) |              |
|-----|---------------|----------------------------------------|-----------------------------------------------------------------------------|--------------|
|     |               |                                        | Longitude (X)                                                               | Latitude (Y) |
| 19  | ĐP3           | Thuy Tu Lagoon (Truong Ha Bridge area) | 582453                                                                      | 1816602      |
| 20  | ĐP4           | Cau Hai Lagoon (Loc An Commune area)   | 585464                                                                      | 1804478      |

**SI Table S2.** Overall bootstrap estimates for seasonal VN WQI

| Comparison             | n   | Bootstrap estimate<br>(95% CI) |
|------------------------|-----|--------------------------------|
| Dry season             | 79  | 89.29 (86.68–91.61)            |
| Rainy season           | 112 | 81.79 (78.62–84.77)            |
| Rainy – dry difference | 191 | -7.50 (-11.44–-3.58)           |

## Supporting information SI Text. Water quality assessment based on VN\_WQI

Decision No. 1460/QD-TCMT dated 12 November 2019, issued by Vietnam Environment Agency (VEA), regarding the promulgation of Technical Guidelines for calculation and publication of the Vietnam Water Quality Index (VN-WQI).

### 1. Guidelines for calculating the water quality index (VN-WQI)

Data requirements: using reliable and available water quality data obtained from monitoring program conducted in local or regional area; QA/QC process must be regularly implemented.

### 2. Selected parameters: The parameters used to calculate VN-WQI are divided into 5 groups, including:

Group I: pH

Group II: pesticides, including Aldrin, BHC, Dieldrin, DDTs (p,p'-DDT, p,p'-DDD, p,p'-DDE), Heptachlor & Heptachlorepoxyd

Group III: dissolved heavy metals, including As<sup>III,V</sup>, Cd<sup>II</sup>, Pb<sup>II</sup>, Cr<sup>VI</sup>, Cu<sup>II</sup>, Zn<sup>II</sup> and Hg<sup>II</sup>

Group IV: organic and nutrient pollutants, including DO (dissolved oxygen), BOD5 (five-day biochemical oxygen demand), COD (chemical oxygen demand), TOC (total organic carbons), N-NH<sub>4</sub> (ammonium), N-NO<sub>3</sub> (nitrate), N-NO<sub>2</sub> (nitrite), P-PO<sub>4</sub> (phosphate)

Group V: bacteria, including Total coliform and E. coli.

The least numbers of the parameter groups used for the VN-WQI calculation must be three of the five groups, in which the Group III is completed. If water body is affected by heavy metals, the Group III must be taken into account and if affected by pesticides, the Group II must be taken into account.

### 3. Calculation of parameter water quality index (WQI<sub>SI</sub>) or subindex for each parameter

- Calculation for As<sup>III,V</sup>, Cd<sup>II</sup>, Pb<sup>II</sup>, Cr<sup>VI</sup>, Cu<sup>II</sup>, Zn<sup>II</sup>, Hg<sup>II</sup>, BOD<sub>5</sub>, COD, TOC, N-NH<sub>4</sub>, N-NO<sub>2</sub>, N-NO<sub>3</sub>, P-PO<sub>4</sub>, Total coliform, and E. coli was as follows:

$$WQI_{SI} = \frac{q_i - q_{i+1}}{BP_{i+1} - BP_i} (BP_{i+1} - C_p) + q_{i+1} \quad (\text{Eq.1})$$

In which:

BP<sub>i</sub> : Lower limit concentration of the selected parameter specified in Table 1 corresponding to level i;

$BP_{i+1}$ : Upper limit concentration of the selected parameter specified in Table 1 corresponding to level  $i+1$ ;

$q_i$ : WQI value at level  $i$  given in Table 1 corresponding to  $BP_i$  value;

$q_{i+1}$ : WQI value at level  $i+1$  given in Table 1 corresponding to  $BP_{i+1}$  value

$C_p$ : The value of the monitored parameter used for the  $WQI_{SI}$  calculation.

**Table 1.** The specified  $q_i$ ,  $BP_i$  values for the selected parameters of groups IV and V(\*)

| i | $q_i$ | $BP_i$ value for each selected parameter |       |      |                   |                   |                   |                   |                |        |
|---|-------|------------------------------------------|-------|------|-------------------|-------------------|-------------------|-------------------|----------------|--------|
|   |       | BOD <sub>5</sub>                         | COD   | TOC  | N-NH <sub>4</sub> | N-NO <sub>3</sub> | N-NO <sub>2</sub> | P-PO <sub>4</sub> | Total coliform | E.coli |
|   |       | mg/L                                     |       |      |                   |                   |                   |                   | MPN/100 mL     |        |
| 1 | 100   | ≤ 4                                      | ≤ 10  | ≤ 4  | < 0.3             | ≤ 2               | ≤ 0.05            | ≤ 0.1             | ≤ 2500         | ≤ 20   |
| 2 | 75    | 6                                        | 15    | 6    | 0.3               | 5                 |                   | 0.2               | 5000           | 50     |
| 3 | 50    | 15                                       | 30    | 15   | 0.6               | 10                |                   | 0.3               | 7500           | 100    |
| 4 | 25    | 25                                       | 50    | 25   | 0.9               | 15                |                   | 0.5               | 10000          | 200    |
| 5 | 10    | ≥ 50                                     | ≥ 150 | ≥ 50 | ≥ 5               | ≥ 15              | ≥ 0.05            | ≥ 4               | ≥ 10000        | ≥ 200  |

**Table 2.** The specified  $q_i$ ,  $BP_i$  values for the selected heavy metals (group III)(\*)

| i | $q_i$ | $BP_i$ value for each selected parameter |                  |                  |                  |                  |                  |                  |
|---|-------|------------------------------------------|------------------|------------------|------------------|------------------|------------------|------------------|
|   |       | As <sup>III,V</sup>                      | Cd <sup>II</sup> | Pb <sup>II</sup> | Cr <sup>VI</sup> | Cu <sup>II</sup> | Zn <sup>II</sup> | Hg <sup>II</sup> |
|   |       | mg/L                                     |                  |                  |                  |                  |                  |                  |
| 1 | 100   | ≤ 0.01                                   | < 0.005          | < 0.02           | ≤ 0.01           | ≤ 0.1            | ≤ 0.5            | < 0.001          |
| 2 | 75    | 0.02                                     | 0.005            | 0.02             | 0.02             | 0.2              | 1.0              | 0.001            |
| 3 | 50    | 0.05                                     | 0.008            | 0.04             | 0.04             | 0.5              | 1.5              | 0.0015           |
| 4 | 25    | 0.1                                      | 0.01             | 0.05             | 0.05             | 1.0              | 2.0              | 0.002            |
| 5 | 10    | > 0.1                                    | ≥ 0.1            | ≥ 0.5            | ≥ 0.1            | ≥ 2              | ≥ 3              | ≥ 0.01           |

(\*) If the  $C_p$  value for a parameter equals to  $BP_i$  specified in the table, the  $WQI_{SI}$  for the parameter is accepted to equal to the respective  $q_i$  value.

- $WQI_{SI}$  calculation for parameter DO, based on DO% saturation value

- Step 1: calculate DO% saturation value ( $DO_{saturation}$ )

$$DO_{saturation} = 14.652 - 0.41022T + 0.0079910T^2 - 0.000077774T^3$$

In which,

T: water temperature at the time of monitoring, °C

$$DO\%_{saturation} = (DO_{dissolved} / DO_{saturation}) \times 100$$

$DO_{dissolved}$ : the DO value measured at the time of monitoring, mg/L

- Step 2: Calculate  $WQI_{SI}$

$$WQI_{SI} = \frac{q_{i+1} - q_i}{BP_{i+1} - BP_i} (C_p - BP_i) + q_i \quad (\text{Eq.2})$$

In which:

$C_p$ : DO% saturation value

$BP_i$ ,  $BP_{i+1}$ ,  $q_i$ ,  $q_{i+1}$ : the accordant values in Table 3

Table 3. The specified  $q_i$ ,  $BP_i$  values for DO% saturation value

|        |      |    |    |    |     |     |     |     |     |       |
|--------|------|----|----|----|-----|-----|-----|-----|-----|-------|
| i      | 1    | 2  | 3  | 4  | 5   | 6   | 7   | 8   | 9   | 10    |
| $BP_i$ | < 20 | 20 | 50 | 75 | 88  | 112 | 125 | 150 | 200 | > 200 |
| $q_i$  | 10   | 25 | 50 | 75 | 100 | 100 | 75  | 50  | 25  | 10    |

If DO% saturation value < 20 or DO% saturation value > 200, then  $WQI_{SI} = 10$ .

If  $20 < \text{DO\% saturation value} < 88$ , then  $WQI_{SI}$  is calculated according to Eq.2 and Table 3.

If  $88 \leq \text{DO\% saturation value} \leq 112$ , then  $WQI_{SI} = 100$ .

If  $112 < \text{DO\% saturation value} < 200$ , then  $WQI_{SI}$  is calculated according to Eq.1 and Table 3.

- $WQI_{SI}$  calculation for parameter pH:

Table 4. The specified  $q_i$ ,  $BP_i$  values for parameter pH

|        |       |     |     |     |    |     |
|--------|-------|-----|-----|-----|----|-----|
| i      | 1     | 2   | 3   | 4   | 5  | 6   |
| $BP_i$ | > 5.5 | 5.5 | 6   | 8.5 | 9  | > 9 |
| $q_i$  | 10    | 50  | 100 | 100 | 50 | 10  |

If  $\text{pH} < 5.5$  or  $\text{pH} > 9$ , then  $WQI_{SI} = 10$ .

If  $5.5 < \text{pH} < 6$ , then the  $WQI_{SI}$  is calculated according to Eq.2 and Table 4.

If  $6 \leq \text{pH} \leq 8.5$ , then the  $WQI_{SI}$  is 100.

If  $8.5 < \text{pH} < 9$ , then  $WQI_{SI}$  is calculated according to Eq.1 and Table 4.

- Calculation for the parameters in Group II: Aldrin, BHC, Dieldrin, DDTs, Heptachlor and Heptachlorepoide

| Parameter            | Measured concentration<br>( $\mu\text{g/L}$ ) | $WQI_{SI}$ |
|----------------------|-----------------------------------------------|------------|
| Aldrin               | $\leq 0.01$                                   | 100        |
|                      | $> 0.1$                                       | 10         |
| Benzene hexachloride | $\leq 0.02$                                   | 100        |

|                                    |        |     |
|------------------------------------|--------|-----|
| (BHC)                              | > 0.02 | 10  |
| Dieldrin                           | ≤ 0.1  | 100 |
|                                    | > 0.1  | 10  |
| DDTs                               | ≤ 1.0  | 100 |
|                                    | > 1.0  | 10  |
| Heptachlor and<br>Heptachlorepoide | ≤ 0.2  | 100 |
|                                    | > 0.2  | 10  |

#### 4. Calculation of final WQI

$$WQI = \frac{WQI_I}{100} \times \frac{\left(\prod_{i=1}^n WQI_{II}\right)^{1/n}}{100} \times \frac{\left(\prod_{i=1}^m WQI_{III}\right)^{1/m}}{100} \times \left[ \frac{1}{k} \sum_{i=1}^k WQI_{IV} \times \frac{1}{l} \sum_{i=1}^l WQI_V \right]^{1/2} \quad (\text{Eq.3})$$

In which:

WQ<sub>I</sub>: WQ<sub>SI</sub> calculation results for the parameters in Group I

WQ<sub>II</sub>: WQ<sub>SI</sub> calculation results for the parameters in Group II

WQ<sub>III</sub>: WQ<sub>SI</sub> calculation results for the parameters in Group III

WQ<sub>IV</sub>: WQ<sub>SI</sub> calculation results for the parameters in Group IV

WQ<sub>V</sub>: WQ<sub>SI</sub> calculation results for parameters in Group V

The final WQI is rounded up to be an integer.

#### 5. WQI classification

| WQI range | Water quality   | Color  | RBG color codes |
|-----------|-----------------|--------|-----------------|
| 91 – 100  | Excellent       | Blue   | 51;51;255       |
| 76 – 90   | Good            | Green  | 0;228;0         |
| 51 – 75   | Moderate        | Yellow | 255;255;0       |
| 26 – 50   | Poor            | Orange | 255;126;0       |
| 10 – 25   | Very poor       | Red    | 255;0;0         |
| < 10      | Highly polluted | Brown  | 126;0;35        |
